# Supplementary material for: Encapsulation of Sorghum Leaf Red Dye: Biological and Physicochemical Properties and Effect on Stability
Source: MDPI journal article supplement (doi:10.3390/foods12081646), 2023-04-14
Supplement: s1 [file s1]

## Supplementary Materials

# Encapsulation of Sorghum Leaf Red Dye: Biological and Physicochemical Properties and Effect on Stability

Carmo Serrano <sup>1,2,\*</sup>, Margarida Sapata <sup>1</sup>, M. Conceição Oliveira <sup>3</sup>, Andreia Soares <sup>1</sup>, Carla Pereira <sup>4,5</sup>, Rui M. V. Abreu <sup>4,5</sup> and Lillian Barros <sup>4,5</sup>

<sup>1</sup> Instituto Nacional de Investigação Agrária e Veterinária (INIAV, I.P.), Av. da República, 2780-157 Oeiras, Portugal

<sup>2</sup> LEAF-Linking Landscape: Environment, Agriculture and Food-Research Center, Instituto Superior de Agronomia, Associated Laboratory TERRA, Universidade de Lisboa, Tapada da Ajuda, 1349-017 Lisboa, Portugal

<sup>3</sup> Centro de Química Estrutural, Institute of Molecular Sciences, Instituto Superior Técnico, Universidade de Lisboa, 1049-001 Lisboa, Portugal

<sup>4</sup> Centro de Investigação de Montanha (CIMO), Instituto Politécnico de Bragança, Campus de Santa Apolónia, 5300-253 Bragança, Portugal

<sup>5</sup> Laboratório Associado para a Sustentabilidade e Tecnologia em Regiões de Montanha (SusTEC), Instituto Politécnico de Bragança, Campus de Santa Apolónia, 5300-253 Bragança, Portugal

\* Correspondence: carmo.serrano@iniav.pt

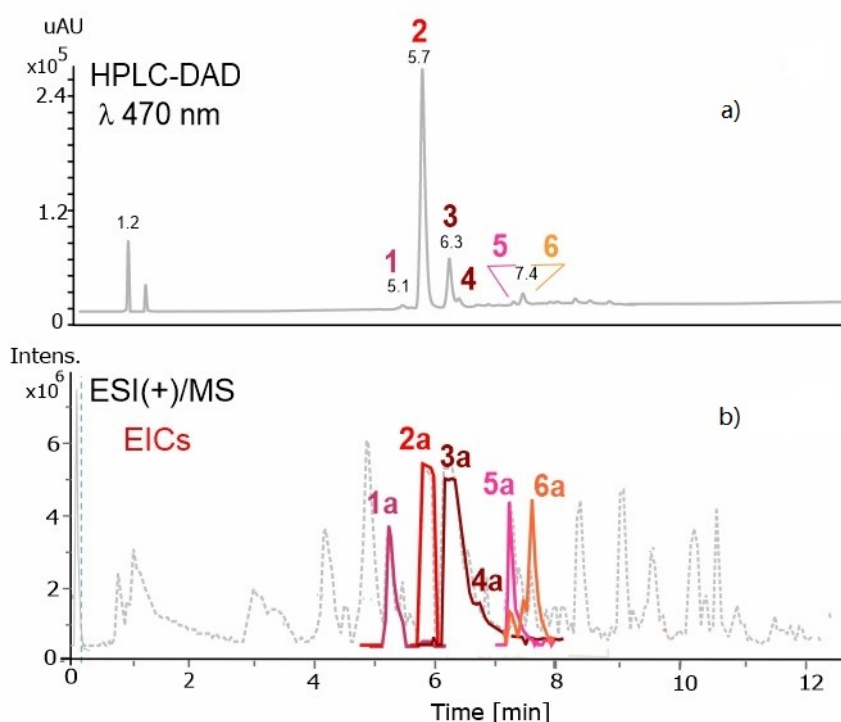

**Figure S1.** LC-DAD-MS analysis obtained in the ESI negative mode for the *Sorghum bicolor* L. extract: (a) DAD chromatogram obtained at 470 nm; (b) total ion chromatogram (in gray) and extracted ion chromatograms for the cationic ions of : **1a**  $m/z$  271.0601 luteolinidin; **2a**  $m/z$  255.0652 apigeninidin; **3a** and **4a**  $m/z$  269.0814 methoxyapigeninidin isomers; **5a**  $m/z$  509.1238 apigeninidin-flavene dimer, and **6a**  $m/z$  523.1392 apigeninidin-7-*O*-methoxyflavene dimer.

The peaks 1-6 observed in Figure S1a have a direct correspondence with peaks 1a-6a observed in Figure S1b being identified through the EICs values listed in the figure caption.
